# Supplementary material
Source: PubMed Central journal article supplement (PMC1820448)
Supplement: molcellb_27_5_1784__3.pdf [file molcellb_27_5_1784__3.pdf]

## Supplementary Data

Supp. Data Figure 1. Amino acid sequence alignment of the human RecQ DNA helicases and the *E. coli* helicase prototype, RecQ. The gene names are on the left. Sequence alignments were performed using the ClustalW multiple sequence alignment program. The shaded residues indicate amino acid identity or chemical similarity at that position. Dashes indicate spaces introduced by the program to maintain sequence alignment. The conserved helicase domains as described by Gorbalenya et al. (19) are overlined and numbered with Roman numerals.

Supp. Data Figure 2. Growth curves for RECQL mouse embryonic fibroblasts. Mouse embryonic fibroblasts ( $5 \times 10^3$ ) isolated from embryonic day 15.5 mice were plated at passage four in triplicate into 96 well plates in medium containing 15% FCS. Cell growth was assayed using the cell proliferation reagent WST-1 at the times indicated. Each time point represents the average of triplicate wells from two independent cell lines, and error bars represent the S.E.M. from the two cell lines. The closed diamonds (◆) represent +/+ cells and the closed squares (■) represent -/- cells.
