# Supplementary material
Source: PubMed Central journal article supplement (PMC1820448)

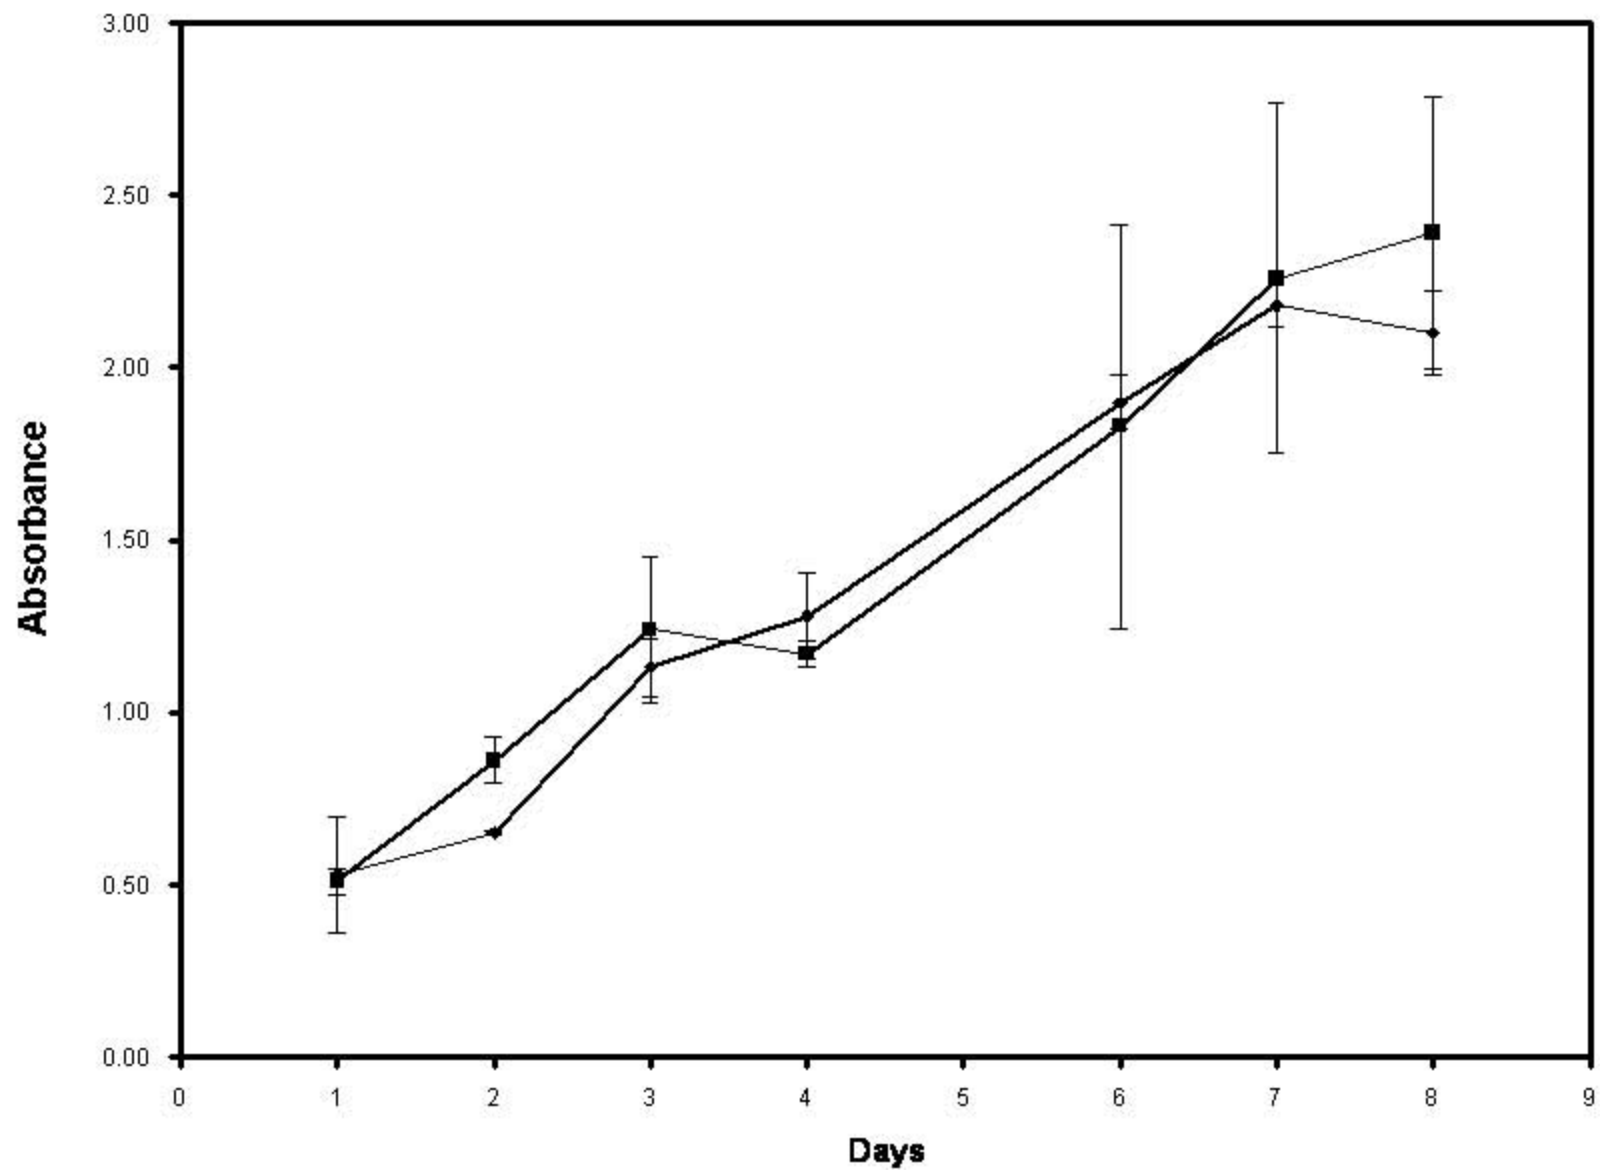

Supp. Data Figure 2

Supplement: molcellb_27_5_1784__2.pdf [file molcellb_27_5_1784__2.pdf]
